# Supplementary material for: Disc-shaped fossils resembling porpitids or eldonids from the early Cambrian (Series 2: Stage 4) of western USA
Source: PeerJ journal article supplement (doi:10.7717/peerj.3312), 2017-06-06

Electron Image 8

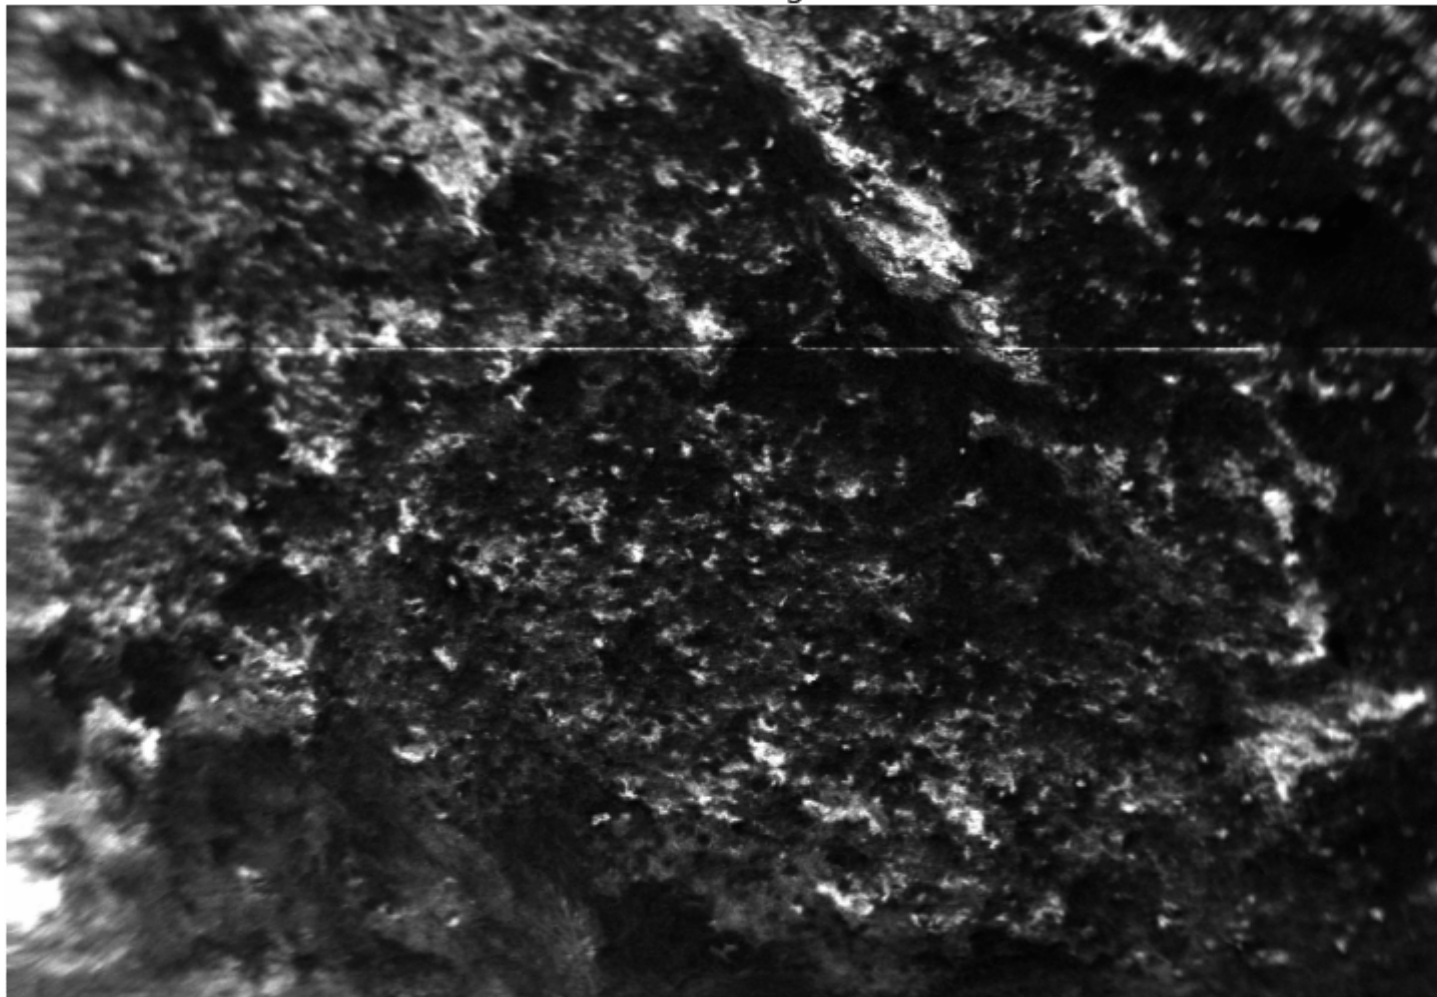

1mm

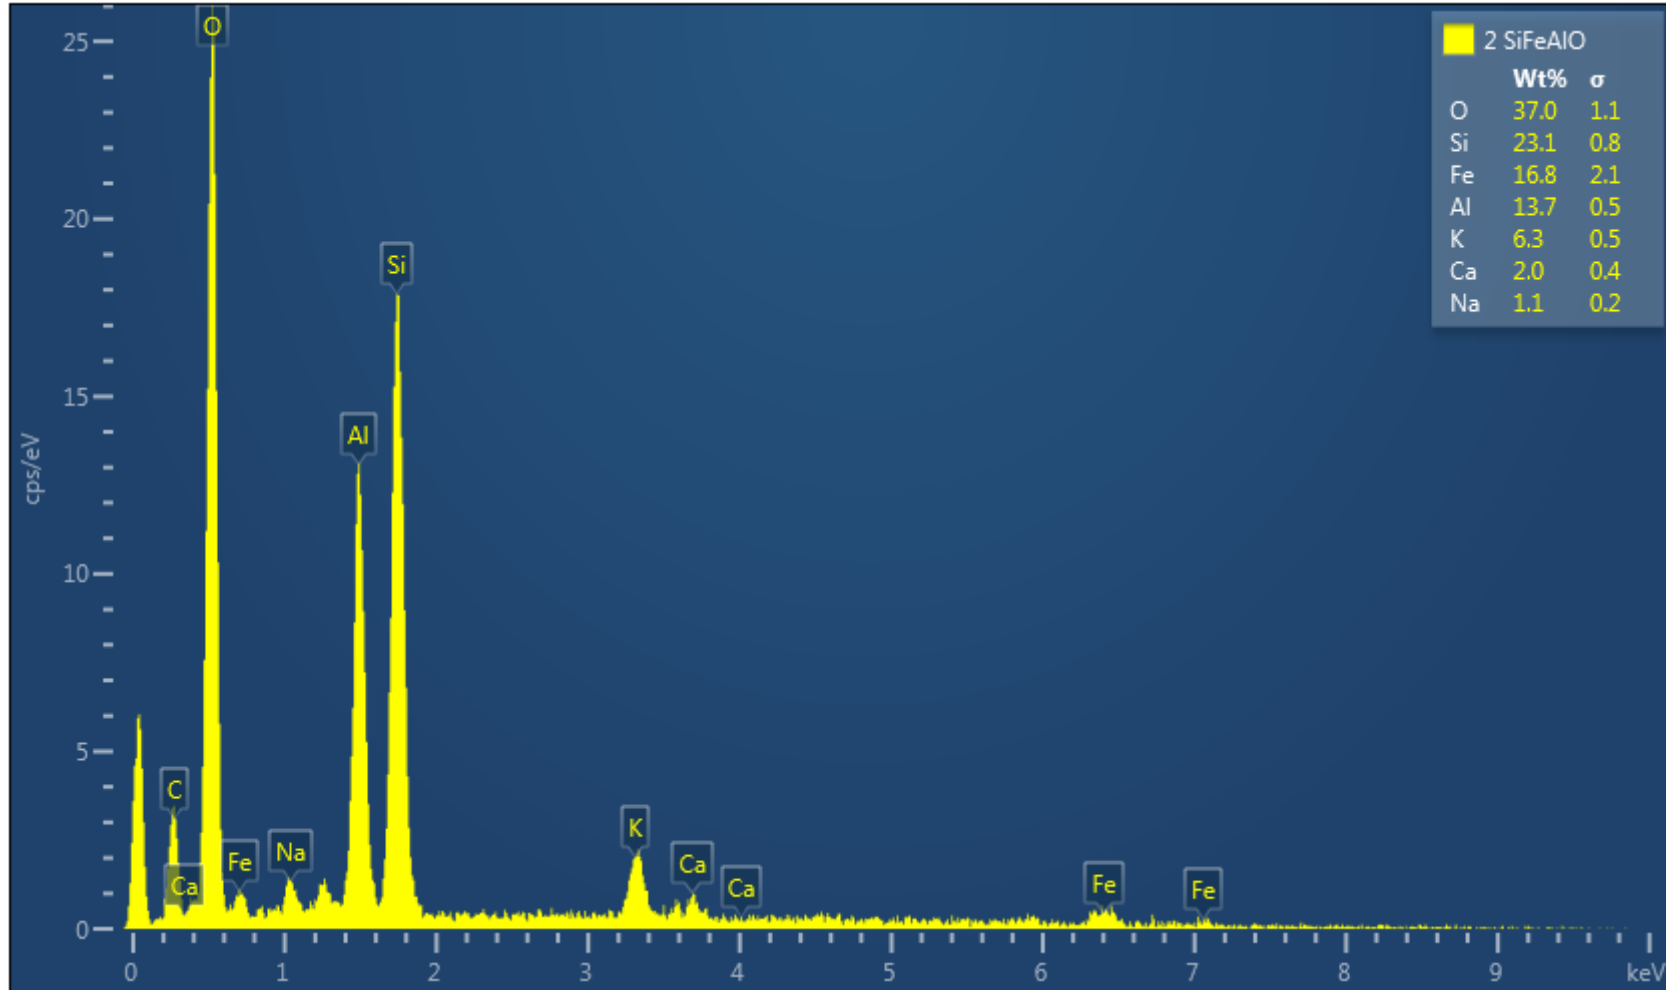

Supplement: SpectraKUMIP389538a2.pdf [file SpectraKUMIP389538a2.pdf]
